# Supplementary material for: Microbial Fermentation Enhances the Effect of Black Tea on Hyperlipidemia by Mediating Bile Acid Metabolism and Remodeling Intestinal Microbes
Source: Nutrients. 2024 Mar 28;16(7):998. doi: 10.3390/nu16070998 (PMC11013065; doi:10.3390/nu16070998)
Supplement: Supplementary file 1 [file nutrients-16-00998-s001.zip › Supplementary Tables S1-S3.xlsx]

## Sheet: Table S1
Table S1. The compositions and energy densities of the diets
Materials	Energy(kcal/kg)
	Maintenance chow diet	HFFCD
Crude protein	889.89	828.8
Crude fat	431.35	1760.76
Carbohydrates	2564.76	1828.64
Total energy	3886	4418.2

## Sheet: Table S2
Table S2. Sequences of primers for RT-qPCR
Gene	Forward: (5'-3')	Reverse: (3'-5')
FXR	GGGATGAGTGTGAAGCCAGCTA	GTGGCTGAACTTGAGGAAACGG
CYP7A1	CCGAGTGATGTTTGAAGCCG	AGCCTTTCCCGGGCTTTATG
CYP27A1	GGAGAGTACGGAGGGTCCAG	GTGGGGCACTAGCCAGATTC
ASBT	GGTTTCTTCCTGGCTAGACTAGC	GGAAGGTGAACACCAGGTTGAG
β-actin	GCAGGAGTACGATGAGTCCG	ACGCAGCTCAGTAACAGTCC

## Sheet: Table S3
Table S3. The sequence quality of 16S rRNA sequencing
Sample name	Raw tags	Clean_tags	Effective tags	Effective ratio(%)	Effective bases(nt)	Min length	Max length	Mean length	Q20(%)	Q30(%)	GC(%)
Con_1	90,188	89,308	82,532	91.51	34,806,898	208	433	422	97.72	93.43	54.19
Con_2	54,275	53,892	51,964	95.74	21,775,434	220	430	419	97.84	93.65	53.54
Con_3	95,012	93,840	91,103	95.89	38,178,490	235	437	419	97.63	93.34	53.29
Con_4	92,114	91,110	80,098	86.96	33,633,186	250	437	420	97.55	93.09	54.26
Con_5	84,832	84,126	71,950	84.81	30,412,698	162	437	423	97.62	93.23	54.57
Con_6	88,664	87,536	74,432	83.95	31,408,256	250	430	422	97.46	92.82	54.54
Mod_1	89,897	89,118	83,816	93.24	34,673,074	199	431	414	97.86	93.83	54.28
Mod_2	90,996	90,437	81,075	89.1	33,582,160	183	434	414	98.12	94.46	54.87
Mod_3	88,624	87,976	83,044	93.7	34,445,984	245	434	415	98.04	94.29	54.26
Mod_4	89,821	89,174	82,169	91.48	34,469,043	262	430	419	98.08	94.27	55.52
Mod_5	86,096	85,509	75,097	87.22	31,562,854	263	431	420	97.9	93.96	56.35
Mod_6	78,422	78,084	69,317	88.39	29,259,291	326	430	422	98.01	94.02	56.66
Pos_1	86,466	85,487	66,911	77.38	28,037,547	225	437	419	97.61	93.26	54.87
Pos_2	89,206	88,183	70,980	79.57	29,803,519	250	430	420	97.57	93.14	55.18
Pos_3	89,159	88,199	73,353	82.27	30,819,368	170	437	420	97.66	93.36	54.9
Pos_4	89,253	88,509	69,833	78.24	29,192,708	208	437	418	97.83	93.74	54.75
Pos_5	92,304	91,284	77,749	84.23	32,613,224	192	437	419	97.84	93.74	54.88
Pos_6	93,420	92,285	79,457	85.05	33,532,726	188	431	422	97.64	93.3	54.49
BT_1	88,082	87,218	73,478	83.42	30,622,913	199	437	417	97.75	93.57	53.56
BT_2	89,603	88,221	64,807	72.33	27,348,479	190	437	422	97.46	92.91	55.17
BT_3	86,033	85,063	71,823	83.48	30,336,732	239	437	422	97.72	93.46	54.87
BT_4	94,213	93,344	79,828	84.73	33,181,834	208	434	416	97.8	93.68	54.61
BT_5	88,281	87,250	77,083	87.32	32,553,666	193	436	422	97.56	93.15	54.48
BT_6	87,982	86,867	70,749	80.41	29,840,340	254	437	422	97.63	93.22	54.96
EFT_1	88,935	88,147	74,403	83.66	31,042,955	255	437	417	97.77	93.55	54.67
EFT_2	92,564	91,687	74,596	80.59	31,209,576	277	437	418	97.93	93.93	55.13
EFT_3	91,957	91,194	80,506	87.55	33,668,974	250	437	418	97.83	93.65	54.96
EFT_4	89,035	88,370	77,820	87.4	32,347,697	258	437	416	98.02	94.1	54.27
EFT_5	87,351	86,429	80,593	92.26	33,626,454	326	430	417	97.84	93.72	55.13
EFT_6	87,820	86,829	74,756	85.12	31,534,040	265	430	422	97.67	93.25	54.99
