# Supplementary figures and images for: Microbial Fermentation Enhances the Effect of Black Tea on Hyperlipidemia by Mediating Bile Acid Metabolism and Remodeling Intestinal Microbes
Source: MDPI journal article supplement (doi:10.3390/nu16070998), 2024-03-28

**Figure S1.** Rarefaction curve of each group

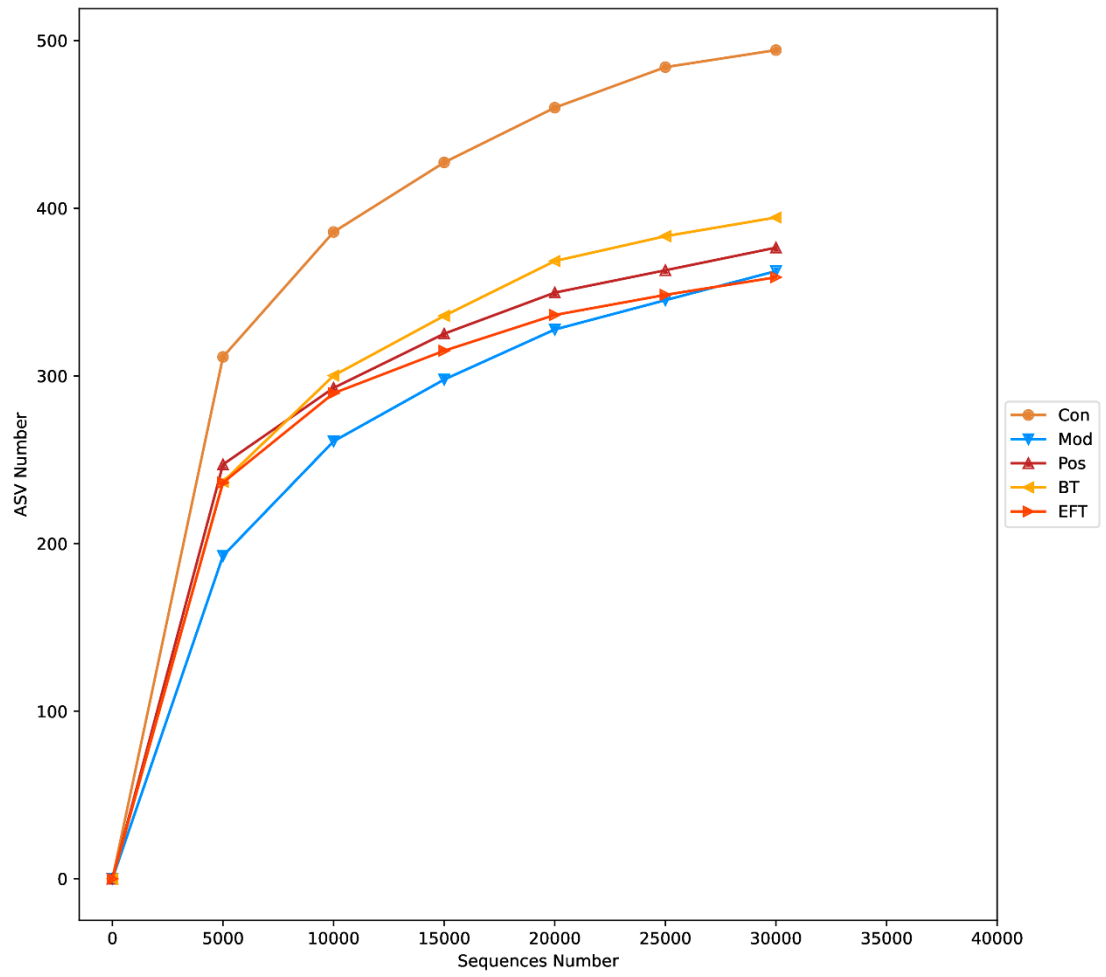

Supplement: s1 [file s1]
